# Supplementary material
Source: Royal Society of Chemistry journal article supplement (doi:10.1039/d6nr00360e)
Supplement: d6nr00360e1.pdf [file d6nr00360e1.pdf]

**Supplemental Material for**  
**Dual-Fullerene-Confined Single Transition Metal Atoms as**  
**High-Efficiency Catalysts for Hydrogen Evolution Reaction**

Jingying Wei<sup>a,b</sup>, Mingyang Shi<sup>b</sup>, Kunyang Cheng<sup>b</sup>, Jiguang Du<sup>a,\*</sup>

<sup>a</sup> College of Physics, Sichuan University, Chengdu 610064, China

<sup>b</sup> Institute of Atomic and Molecular Physics, Sichuan University, Chengdu 610065, China

**Table S1.** Binding energy  $E_b$ (eV) for TM@( $C_{60}$ )<sub>2</sub> as well as other systems, B1(Å), B2(Å), B3(Å), B4(Å) is bond length between the TM atom and the adjacent C atom for TM@( $C_{60}$ )<sub>2</sub>, and the sum of the covalent radius of the TM atom and C atom ( $r_c$ (TM)+ $r_c$ (C)) (Å).

| species | $E_b$    | B1   | B2   | B3   | B4   | $r_c(M)+r_c(C)$ |
|---------|----------|------|------|------|------|-----------------|
| Sc      | -3.43    | 2.26 | 2.26 | 2.25 | 2.27 | 2.43            |
|         | -2.98[c] |      |      |      |      |                 |
|         | -0.67[d] |      |      |      |      |                 |
| Ti      | -3.94    | 2.09 | 2.08 | 2.08 | 2.09 | 2.33            |
|         | -1.58[a] |      |      |      |      |                 |
|         | -1.30[b] |      |      |      |      |                 |
|         | -3.09[c] |      |      |      |      |                 |
|         | -2.22[d] |      |      |      |      |                 |
| V       | -2.95    | 2.17 | 2.17 | 2.17 | 2.17 | 2.26            |
|         | -2.82[c] |      |      |      |      |                 |
|         | -0.57[d] |      |      |      |      |                 |
| Cr      | -2.15    | 2.19 | 2.19 | 2.12 | 2.12 | 2.12            |
|         | -0.18[a] |      |      |      |      |                 |
|         | -3.24[c] |      |      |      |      |                 |
|         | -1.16[d] |      |      |      |      |                 |
| Mn      | -2.42    | 2.11 | 2.10 | 2.10 | 2.11 | 2.12            |
|         | -0.10[a] |      |      |      |      |                 |

|    |          |      |      |      |      |      |
|----|----------|------|------|------|------|------|
|    | -1.53[c] |      |      |      |      |      |
|    | -3.94[d] |      |      |      |      |      |
| Fe | -2.39    | 2.16 | 2.18 | 1.95 | 1.95 | 2.05 |
|    | -0.66[a] |      |      |      |      |      |
|    | -0.85[b] |      |      |      |      |      |
|    | -2.08[c] |      |      |      |      |      |
|    | -4.30[d] |      |      |      |      |      |
| Co | -3.55    | 2.13 | 2.11 | 1.92 | 1.93 | 1.99 |
|    | -1.20[a] |      |      |      |      |      |
|    | -2.64[c] |      |      |      |      |      |
|    | -3.46[d] |      |      |      |      |      |
| Ni | -3.93    | 2.10 | 2.09 | 1.90 | 1.90 | 1.97 |
|    | -6.14[c] |      |      |      |      |      |
|    | -3.48[d] |      |      |      |      |      |
| Cu | -2.35    | 2.05 | 2.06 | 2.06 | 2.05 | 2.05 |
|    | -3.46[c] |      |      |      |      |      |
|    | -3.39[d] |      |      |      |      |      |
| Y  | -3.66    | 2.55 | 2.53 | 2.55 | 2.53 | 2.63 |
| Zr | -4.34    | 2.23 | 2.22 | 2.22 | 2.23 | 2.48 |
| Nb | -3.97    | 2.13 | 2.14 | 2.14 | 2.13 | 2.37 |
| Mo | -2.21    | 2.3  | 2.3  | 2.4  | 2.24 | 2.27 |
| Tc | -3.12    | 2.23 | 2.23 | 2.22 | 2.23 | 2.20 |
| Ru | -3.92    | 2.25 | 2.24 | 2.08 | 2.08 | 2.19 |
| Rh | -4.11    | 2.26 | 2.25 | 2.06 | 2.06 | 2.15 |
| Pd | -3.02    | 2.24 | 2.22 | 2.08 | 2.08 | 2.12 |
|    | -1.08[b] |      |      |      |      |      |
| Ag | -1.28    | 2.25 | 2.25 | 2.25 | 2.26 | 2.18 |
| Hf | -4.81    | 2.16 | 2.17 | 2.17 | 2.17 | 2.48 |
| Ta | -4.93    | 2.12 | 2.12 | 2.13 | 2.12 | 2.43 |

|    |          |      |      |      |      |      |
|----|----------|------|------|------|------|------|
| W  | -4.01    | 2.24 | 2.24 | 2.24 | 2.24 | 2.35 |
| Re | -3.52    | 2.24 | 2.22 | 2.08 | 2.08 | 2.24 |
| Os | -4.03    | 2.18 | 2.20 | 2.05 | 2.04 | 2.17 |
| Ir | -4.95    | 2.22 | 2.22 | 2.05 | 2.05 | 2.14 |
| Pt | -4.97    | 2.22 | 2.22 | 2.04 | 2.04 | 2.09 |
| Au | -2.20    | 2.16 | 2.16 | 2.15 | 2.16 | 2.09 |
|    | -0.10[b] |      |      |      |      |      |

---

<sup>a</sup>ref<sup>1</sup>

<sup>b</sup>ref<sup>2</sup>

<sup>c</sup>ref<sup>3</sup>

<sup>d</sup>ref<sup>4</sup>

**Table S2.** Magnetic moment  $M$  ( $\mu_B$ ), Bader charge of metallic atoms ( $Q_{TM^*}$ ) and neighboring carbon atoms ( $Q_{C^*}$ ) in  $TM@(C_{60})_2$  complexes.

| species | M    | Bader Charge ( $ e $ ) |           |
|---------|------|------------------------|-----------|
|         |      | $Q_{TM^*}$             | $Q_{C^*}$ |
| Sc      | 0.76 | 1.352                  | -0.087    |
| Ti      | 0.00 | 1.402                  | -0.096    |
| V       | 2.86 | 1.110                  | -0.108    |
| Cr      | 4.00 | 0.871                  | -0.097    |
| Mn      | 4.34 | 0.713                  | -0.106    |
| Fe      | 2.02 | 0.642                  | -0.064    |
| Co      | 1.00 | 0.630                  | -0.073    |
| Ni      | 0.00 | 0.407                  | -0.081    |
| Cu      | 0.00 | 0.335                  | -0.089    |
| Y       | 0.00 | 1.727                  | -0.086    |
| Zr      | 0.00 | 1.793                  | -0.095    |
| Nb      | 1.00 | 1.372                  | -0.104    |
| Mo      | 4.00 | 0.735                  | -0.113    |
| Tc      | 3.62 | 0.846                  | -0.105    |
| Ru      | 2.00 | 0.608                  | -0.114    |
| Rh      | 1.00 | 0.352                  | -0.123    |
| Pd      | 0.00 | 0.266                  | -0.082    |
| Ag      | 0.00 | 0.334                  | -0.088    |
| Hf      | 0.00 | 1.732                  | -0.079    |
| Ta      | 1.00 | 1.668                  | -0.088    |
| W       | 2.00 | 0.857                  | -0.117    |
| Re      | 3.00 | 1.016                  | -0.037    |
| Os      | 0.00 | 0.724                  | -0.064    |
| Ir      | 1.00 | 0.599                  | -0.072    |
| Pt      | 0.00 | 0.354                  | -0.081    |
| Au      | 0.00 | 0.499                  | -0.090    |

**Table S3.** The adsorption energy  $\Delta E_{\text{ads}}$ (eV), Gibbs free energy  $\Delta G_{\text{H}^*}$ (eV) of studied species for the hydrogen evolution reaction, the exchange current ( $\text{Log}(i_0/(\text{Acm}^{-2}))$ ), magnetic moment  $M(\mu_{\text{B}})$  and the Bader charge of the H atom, the TM atom, and the C atom ( $Q_{\text{H}^*}$ ,  $Q_{\text{TM}^*}$ ,  $Q_{\text{C}^*}$ ) in H adsorbed  $\text{TM}@\text{(C}_{60}\text{)}_2$  complexes.

| spieces | $\Delta E_{\text{ads}}$ | $\Delta G_{\text{H}^*}$ | $\text{Log}(i_0)$ | M    | Bader Charge ( e ) |                   |                  |
|---------|-------------------------|-------------------------|-------------------|------|--------------------|-------------------|------------------|
|         |                         |                         |                   |      | $Q_{\text{H}^*}$   | $Q_{\text{TM}^*}$ | $Q_{\text{C}^*}$ |
| Sc      | -0.119                  | 0.067                   | -1.157            | 0.00 | -0.567             | 1.494             | -0.087           |
| Ti      | 0.007                   | 0.223                   | -3.718            | 0.99 | -0.449             | 1.283             | -0.096           |
| V       | 0.061                   | 0.270                   | -4.504            | 1.87 | -0.459             | 1.160             | -0.105           |
| Cr      | 0.210                   | 0.416                   | -6.946            | 3.00 | -0.445             | 1.012             | -0.096           |
| Mn      | 0.246                   | 0.467                   | -7.809            | 4.00 | -0.336             | 0.944             | -0.106           |
| Fe      | -0.407                  | -0.188                  | -3.144            | 0.06 | -0.302             | 0.870             | -0.064           |
| Co      | -0.043                  | 0.218                   | -3.635            | 0.00 | -0.288             | 0.716             | -0.073           |
| Ni      | 0.487                   | 0.702                   | -11.725           | 0.09 | -0.266             | 0.501             | -0.081           |
| Cu      | 0.533                   | 0.760                   | -12.694           | 0.00 | -0.308             | 0.605             | -0.089           |
| Y       | -0.388                  | -0.218                  | -3.645            | 0.00 | -0.643             | 1.851             | -0.086           |
| Zr      | -0.272                  | -0.063                  | -1.093            | 0.93 | -0.620             | 1.952             | -0.095           |
| Nb      | -0.690                  | -0.439                  | -7.331            | 0.00 | -0.542             | -0.208            | -0.104           |
| Mo      | -0.513                  | -0.333                  | -5.561            | 3.00 | -0.452             | 1.174             | -0.113           |
| Tc      | -0.772                  | -0.544                  | -9.092            | 2.00 | -0.341             | 1.064             | -0.105           |
| Ru      | -0.545                  | -0.325                  | -5.431            | 0.00 | -0.263             | 0.774             | -0.114           |
| Rh      | -0.741                  | -0.486                  | -8.117            | 0.00 | -0.224             | 0.474             | -0.123           |
| Pd      | 0.688                   | 0.888                   | -14.841           | 0.14 | -0.168             | 0.344             | -0.082           |
| Ag      | 0.877                   | 1.051                   | -17.560           | 0.00 | -0.452             | 0.422             | -0.088           |
| Hf      | 0.182                   | 0.472                   | -7.877            | 0.00 | -0.490             | 1.782             | -0.079           |
| Ta      | -0.247                  | 0.040                   | -0.756            | 0.00 | -0.433             | 1.238             | -0.088           |
| W       | -0.705                  | -0.509                  | -8.500            | 2.97 | -0.444             | 1.122             | -0.113           |
| Re      | -0.546                  | -0.288                  | -4.815            | 0.59 | -0.404             | 1.248             | -0.055           |
| Os      | -1.092                  | -0.808                  | -13.490           | 1.00 | -0.371             | 1.200             | -0.064           |
| Ir      | -1.244                  | -0.976                  | -16.304           | 0.00 | -0.409             | 0.605             | -0.072           |
| Pt      | 0.153                   | 0.375                   | -6.256            | 0.00 | -0.302             | 0.603             | -0.081           |
| Au      | 0.326                   | 0.596                   | -9.957            | 0.00 | -0.247             | 0.575             | -0.090           |

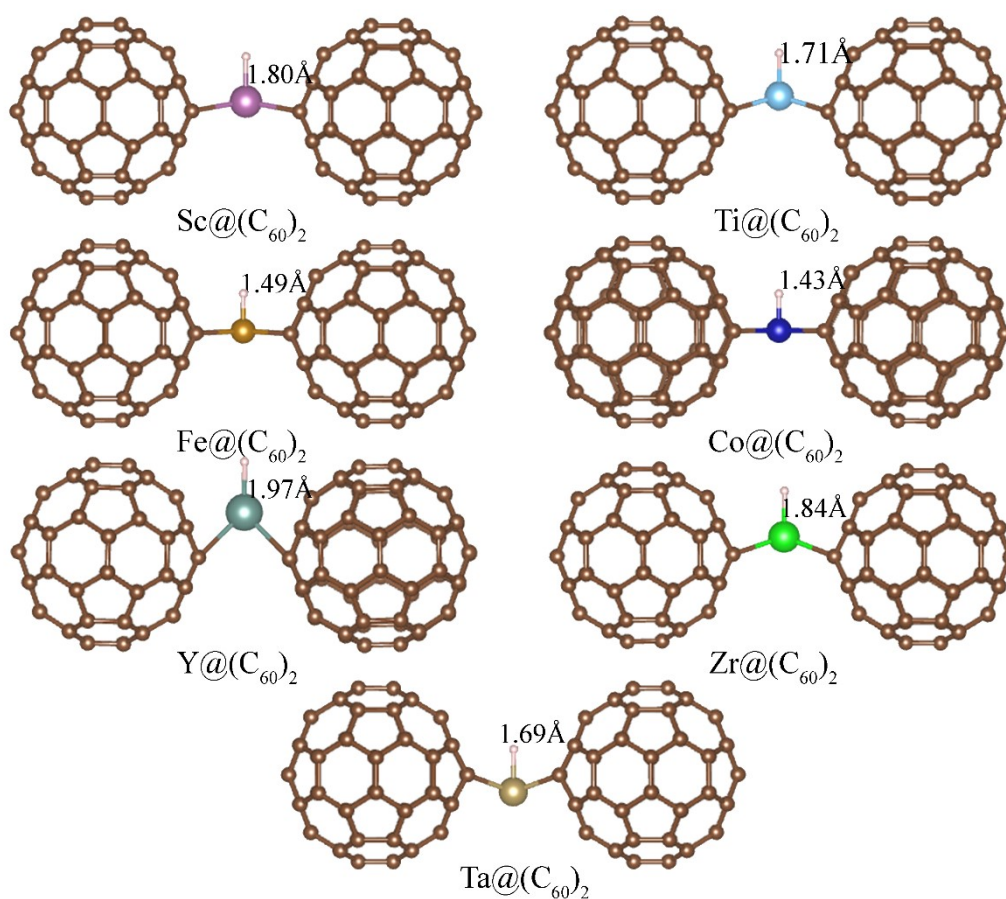

**Figure S1.** The relaxed configurations of TM@(C<sub>60</sub>)<sub>2</sub> upon H adsorption for the species showing excellent Gibbs free energy ( $\Delta G_{H^*}$ ), and bond length between H and the TM atom is also depicted.

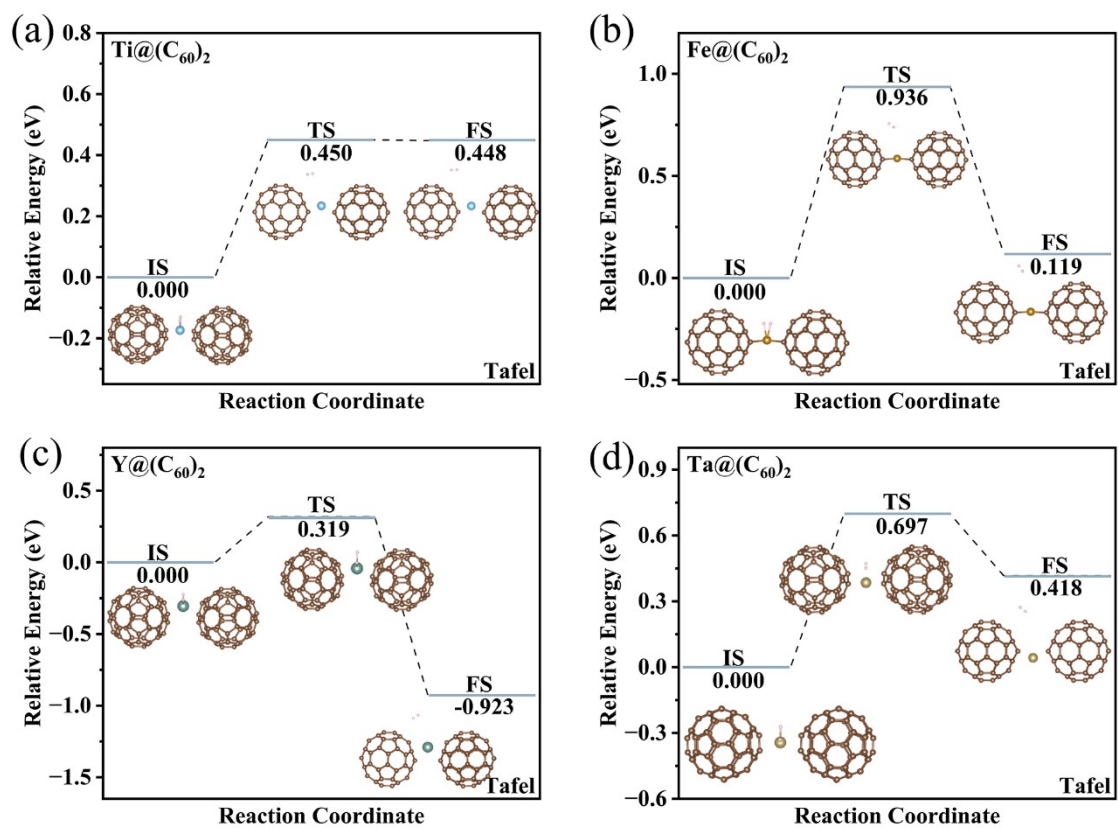

**Figure S2.** (a) Ti@C<sub>60</sub>, (b) Fe@C<sub>60</sub>, (c) Y@C<sub>60</sub>, (d) Ta@C<sub>60</sub> energy barriers under the Tafel pathway.

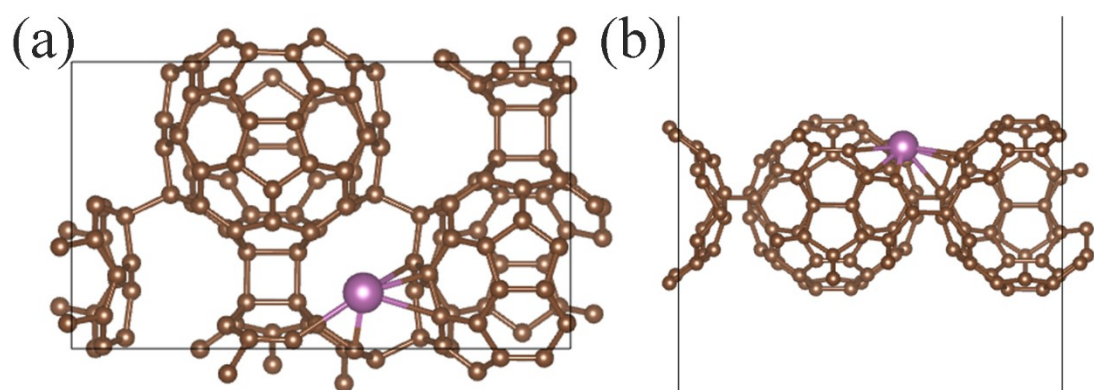

**Figure S3.** Structural representation of single TM atom doping in the 2D qHP C<sub>60</sub> monolayer. (a) top view, (b) side view.

**Table S4.** The binding energy  $E_b$  and Gibbs free energy values  $\Delta G_{H^*}$  of TM@(C<sub>60</sub>)<sub>2</sub> and TM@qHP C<sub>60</sub>.

|    | $E_b$                              |                        | $\Delta G_{H^*}$                   |                        |
|----|------------------------------------|------------------------|------------------------------------|------------------------|
|    | TM@(C <sub>60</sub> ) <sub>2</sub> | TM@qHP C <sub>60</sub> | TM@(C <sub>60</sub> ) <sub>2</sub> | TM@qHP C <sub>60</sub> |
| Sc | -3.430                             | -4.730                 | 0.067                              | 0.120                  |
| Ti | -3.939                             | -4.913                 | 0.223                              | -0.120                 |
| Fe | -2.389                             | -4.223                 | -0.188                             | 0.511                  |
| Co | -3.548                             | -4.544                 | 0.218                              | 0.199                  |
| Y  | -3.660                             | -5.049                 | -0.218                             | 0.239                  |
| Zr | -4.342                             | -5.868                 | -0.063                             | -0.232                 |
| Ta | -4.930                             | -6.089                 | 0.040                              | -0.840                 |
| Pt | -4.969                             | -5.162                 | 0.375                              | 0.510                  |

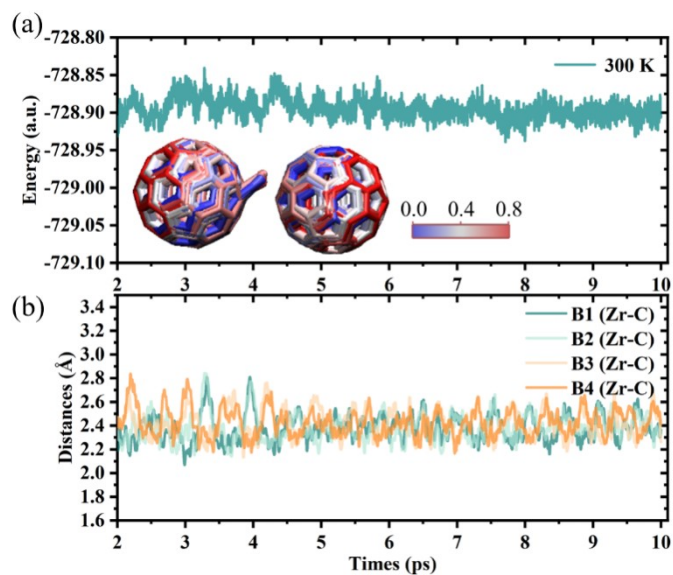

**Figure S4.** (a) Energy variation of  $\text{Zr}@\text{(C}_{60}\text{)}_2$  over the 10 ps simulation at 300 K. Insets show structural snapshots taken every 500 fs, with color coding from red to white to blue indicating the progression of time. (b) Variation of bond distances between Zr and its four neighboring C atoms during the 10 ps simulation.

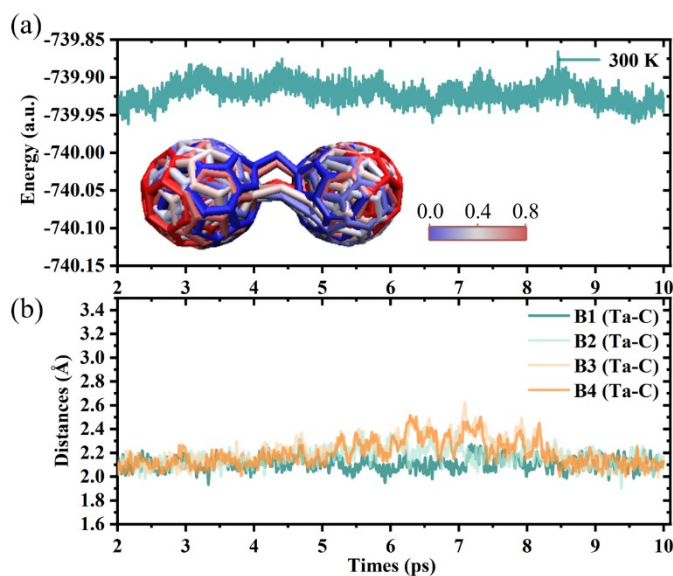

**Figure S5.** (a) Energy variation of  $\text{Ta}@\text{(C}_{60}\text{)}_2$  over the 10 ps simulation at 300 K. Insets show structural snapshots taken every 500 fs, with color coding from red to white to blue indicating the progression of time. (b) Variation of bond distances between Ta and its four neighboring C atoms during the 10 ps simulation.

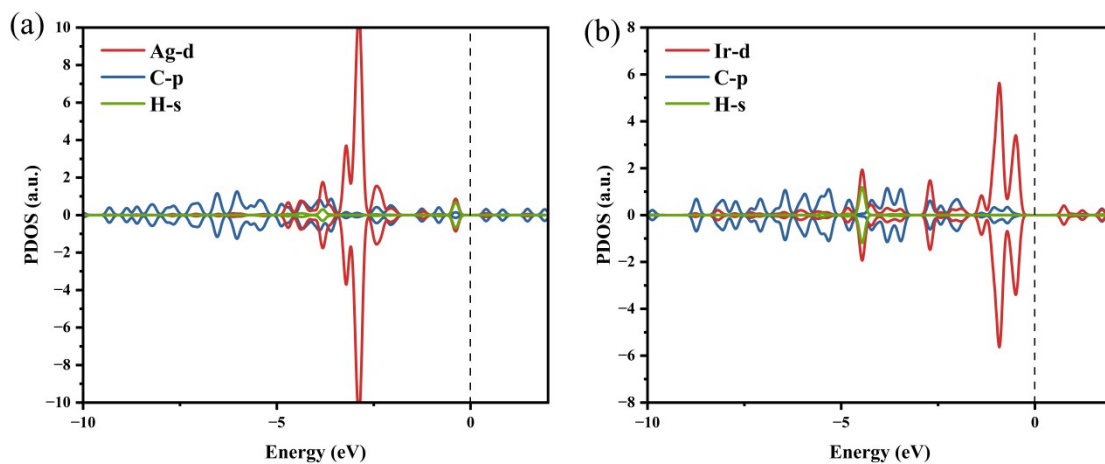

**Figure S6.** PDOS of the d-orbitals of the TM, p-orbitals of carbon C atoms, and the s-orbitals of H in hydrogen adsorbed species (a) Ag@(C<sub>60</sub>)<sub>2</sub> and (b) Ir@(C<sub>60</sub>)<sub>2</sub>.

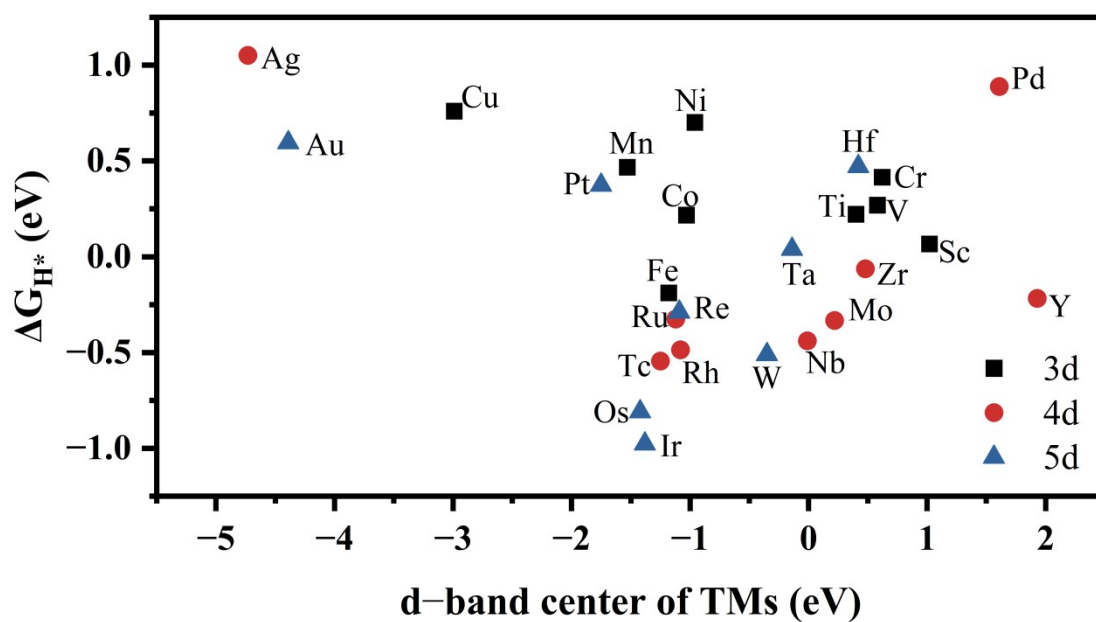

**Figure S7.** Relationship plot of the d-band center of TM@(C<sub>60</sub>)<sub>2</sub> versus Gibbs free energy  $\Delta G_{H^*}$ .

## Reference

- (1) Sevinçli, H.; Topsakal, M.; Durgun, E.; Ciraci, S. Electronic and Magnetic Properties of 3 d Transition-Metal Atom Adsorbed Graphene and Graphene Nanoribbons. *Phys. Rev. B* **2008**, *77* (19), 195434.
- (2) Chan, K. T.; Neaton, J. B.; Cohen, M. L. First-Principles Study of Metal Adatom Adsorption on Graphene. *Phys. Rev. B* **2008**, *77* (23), 235430.
- (3) Sarfaraz, S.; Yar, M.; Sheikh, N. S.; Bayach, I.; Ayub, K. Transition Metal-Doped C<sub>20</sub> Fullerene-Based Single-Atom Catalysts with High Catalytic Activity for Hydrogen Dissociation Reaction. *ACS Omega* **2023**, *8* (15), 14077–14088.
- (4) Sarfaraz, S.; Yar, M.; Ayub, K. The Electronic Properties, Stability and Catalytic Activity of Metallofullerene (M@C<sub>60</sub>) for Robust Hydrogen Evolution Reaction: DFT Insights. *Int. J. Hydrog. Energy* **2024**, *51*, 206–221.
